# Supplementary material
Source: publisher figshare collection journal article supplement (https://frontiersin.figshare.com/ndownloader/files/24057416)
Supplement: Supplementary file [file 24057416]

# Supplementary Material of the manuscript entitled *Ustilago maydis* serves as a novel production host for the synthesis of plant and fungal sesquiterpenoids

Jungho Lee<sup>1</sup>, Fabienne Hilgers<sup>2,3</sup>, Anita Loeschke<sup>2,3</sup>, Karl-Erich Jaeger<sup>2,3</sup> and Michael Feldbrügge<sup>1,\*</sup>

Including Supplementary Figure S1-4 as well as Supplementary Table S1-S4

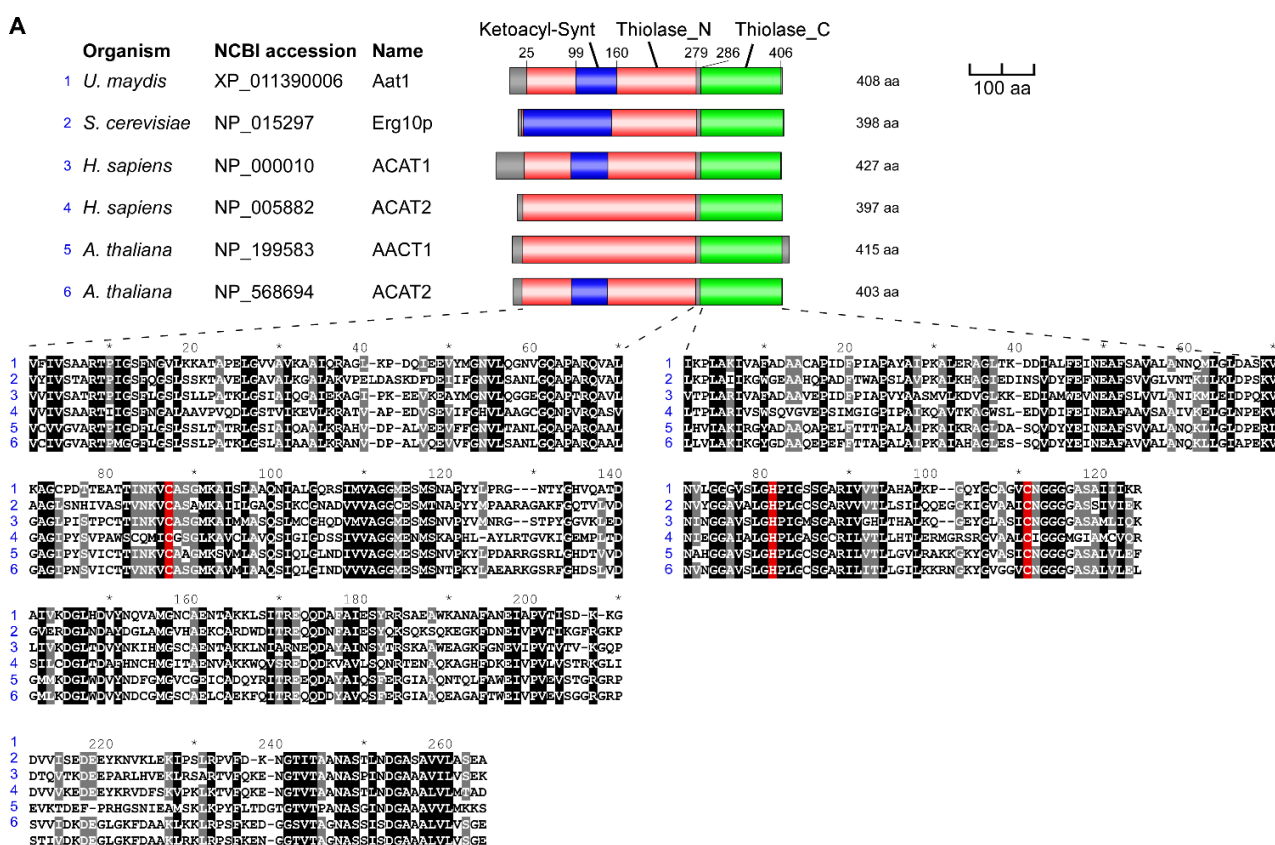

## Supplementary Figure S1. Bioinformatics analysis of *U. maydis* biosynthetic enzymes.

(A) Amino acid sequence comparison of acetyl-CoA C-acetyltransferase Aat1 with homologues in fungi, animals and plants. Domain architecture according to SMART is given on the top (Ketoacyl-Synt, protein families Pfam identifier PF00109; Thiolase\_N, PF00108; Thiolase\_C, PF02803) and a sequence alignment of the corresponding domains is given at the bottom. Key amino acids in the active site of the enzyme from the bacterium *Zoogloea ramigera* are given in red (Miziorko, 2011). (B-H) Continued on next page.

## Novel production host for sesquiterpenoids

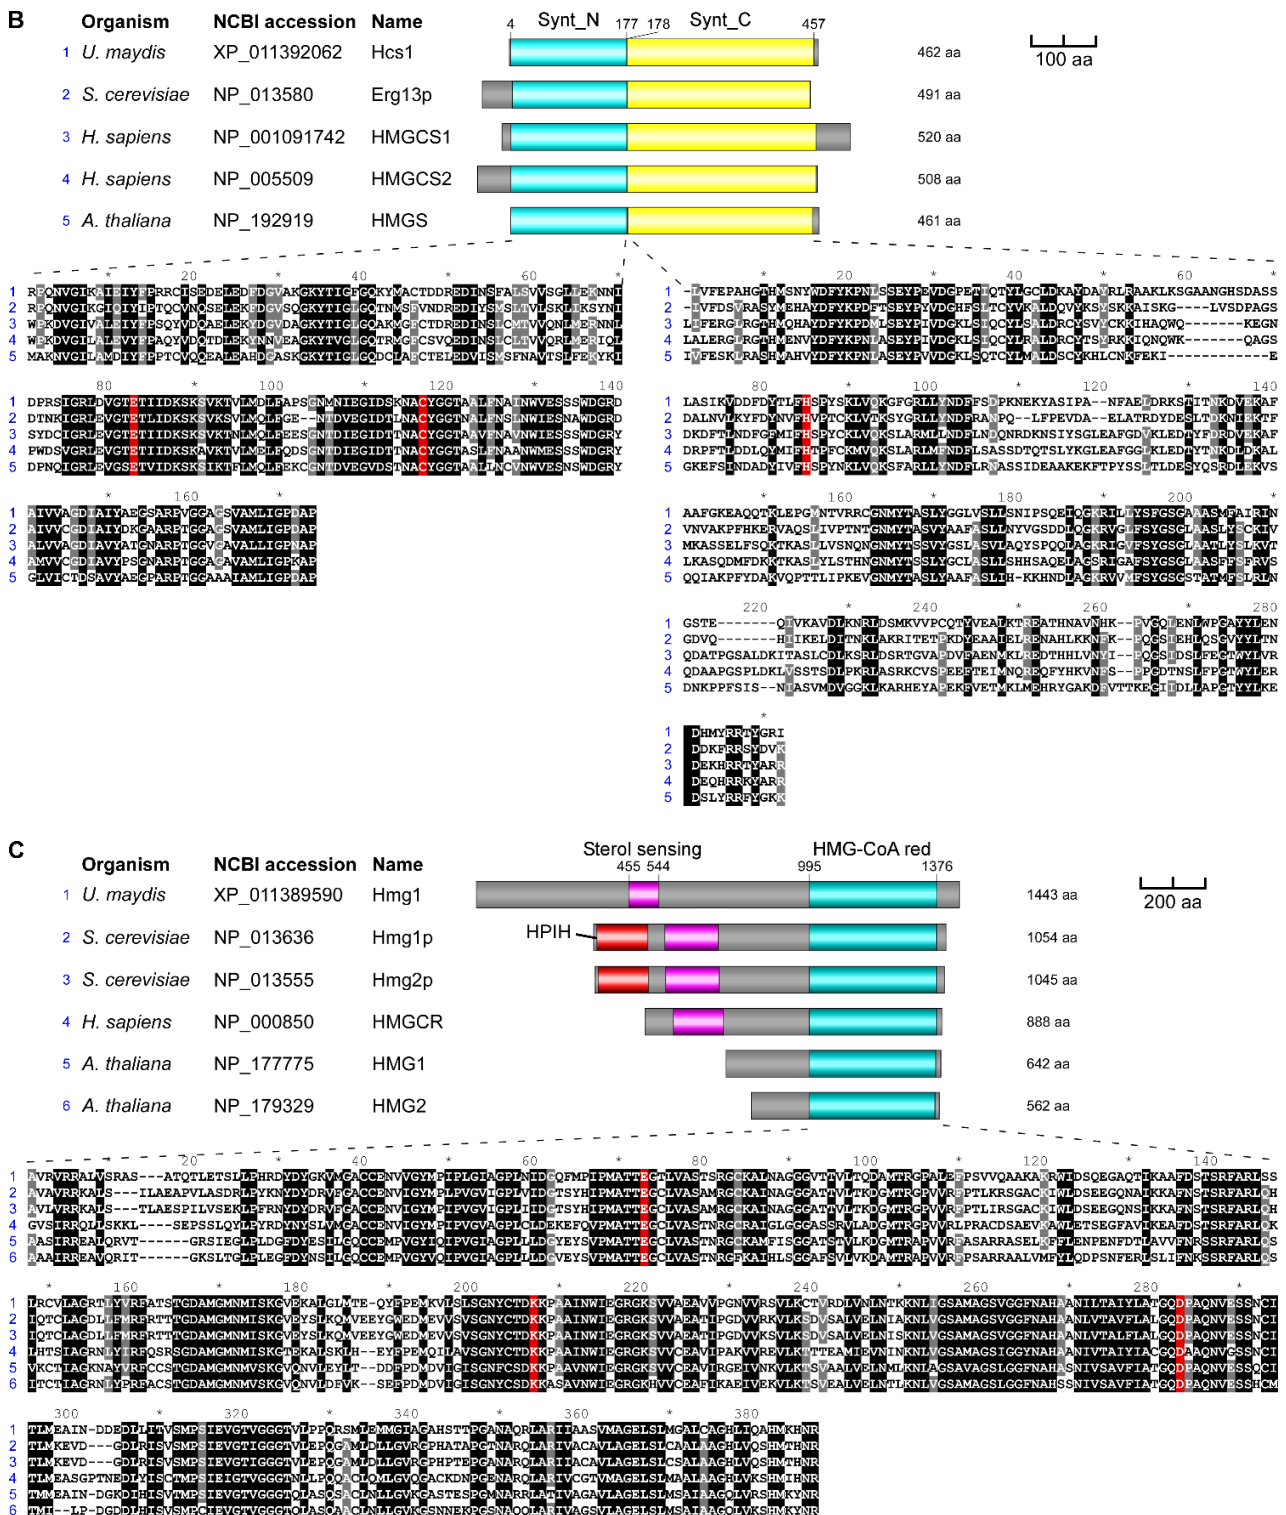

**Supplementary Figure S2. Bioinformatics analysis of *U. maydis* biosynthetic enzymes.**

(B-C) Amino acid sequence comparison of 3-hydroxy-3-methylglutaryl-CoA synthases (B, active site from *Staphylococcus aureus*) and 3-hydroxy-3-methylglutaryl-CoA reductases (C, active site from *H. sapiens*) as shown in (A) (Miziorko, 2011; Synt\_N, PF01154; Synt\_C, PF08540; Sterol sensing, PF12349; HMG-CoA red, PF00368; HPIH, PF13323). (D-H) Continued on next page.

## Novel production host for sesquiterpenoids

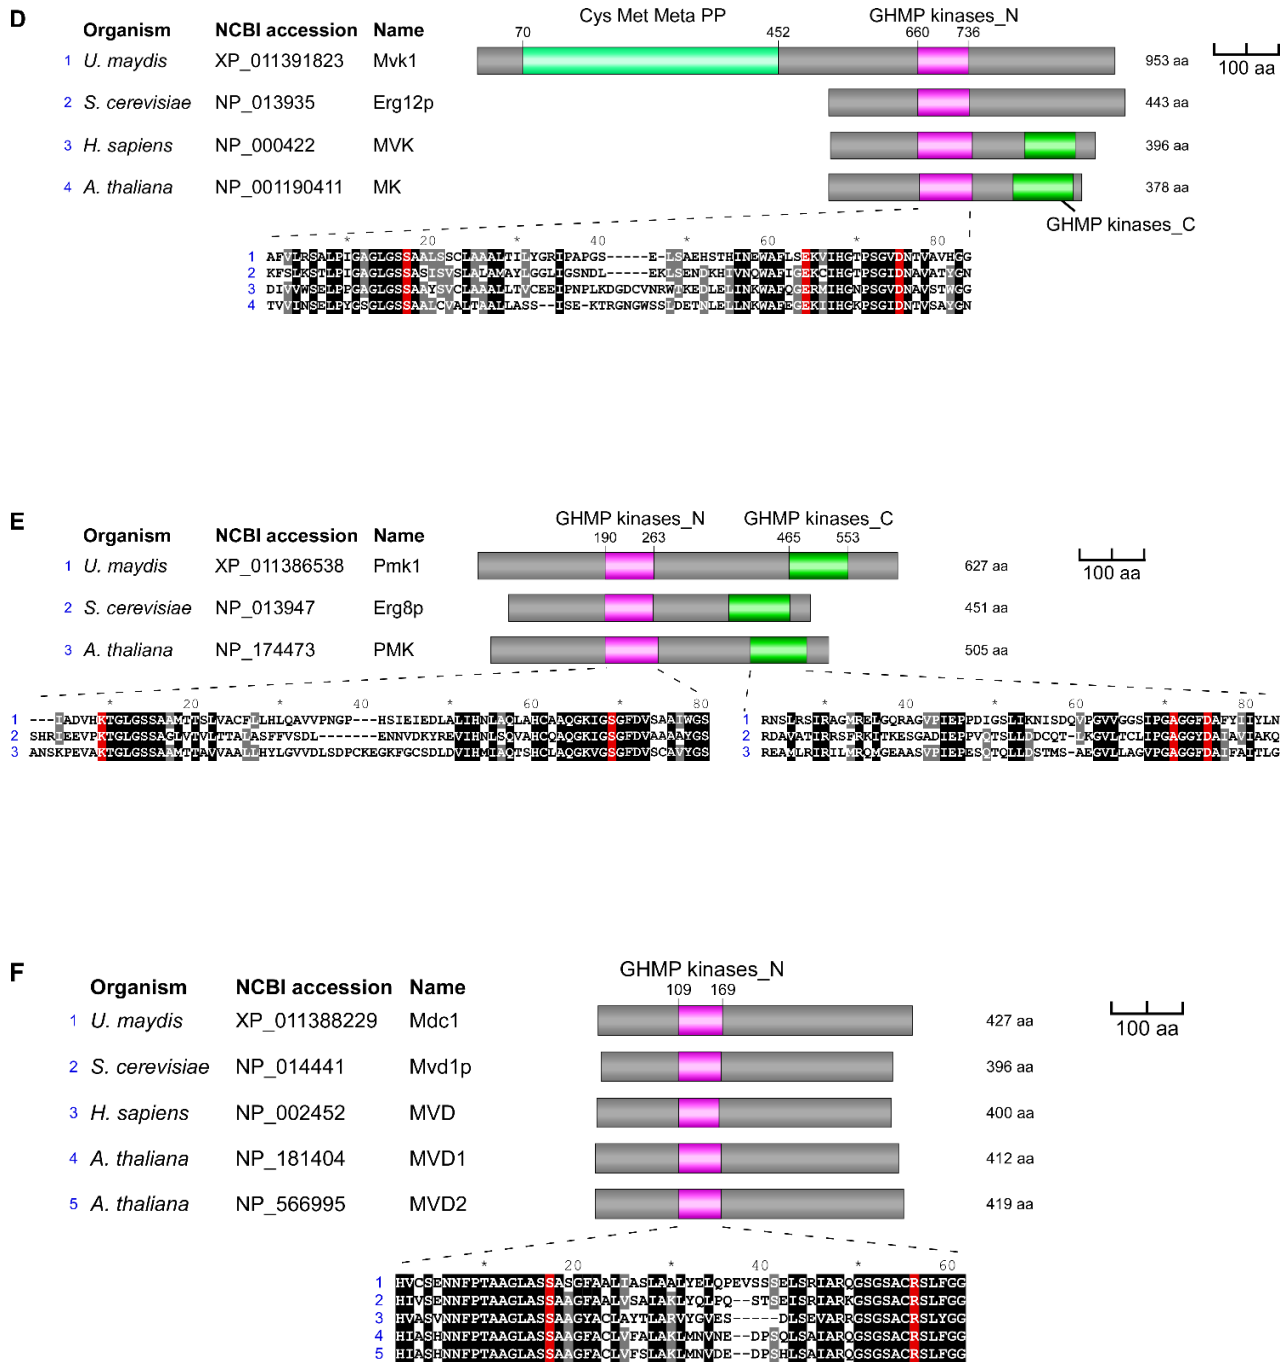

**Supplementary Figure S3. Bioinformatics analysis of *U. maydis* biosynthetic enzymes.**

(D-F) Amino acid sequence comparison of mevalonate kinases (D, active site from *Rattus norvegicus*) and phosphomevalonate kinases (E, active site from the bacterium *Streptococcus pneumoniae*, Andreassi et al. 2009 Biochemistry 48:6461) and mevalonate diphosphate decarboxylases (F, active site from *H. sapiens*) as shown in (A) (Miziorko, 2011; Cys Met Meta PP, PF01053; GHMP kinases\_N, PF00288; GHMP kinases\_C, PF08544). (G-H) Continued on next page.

## Novel production host for sesquiterpenoids

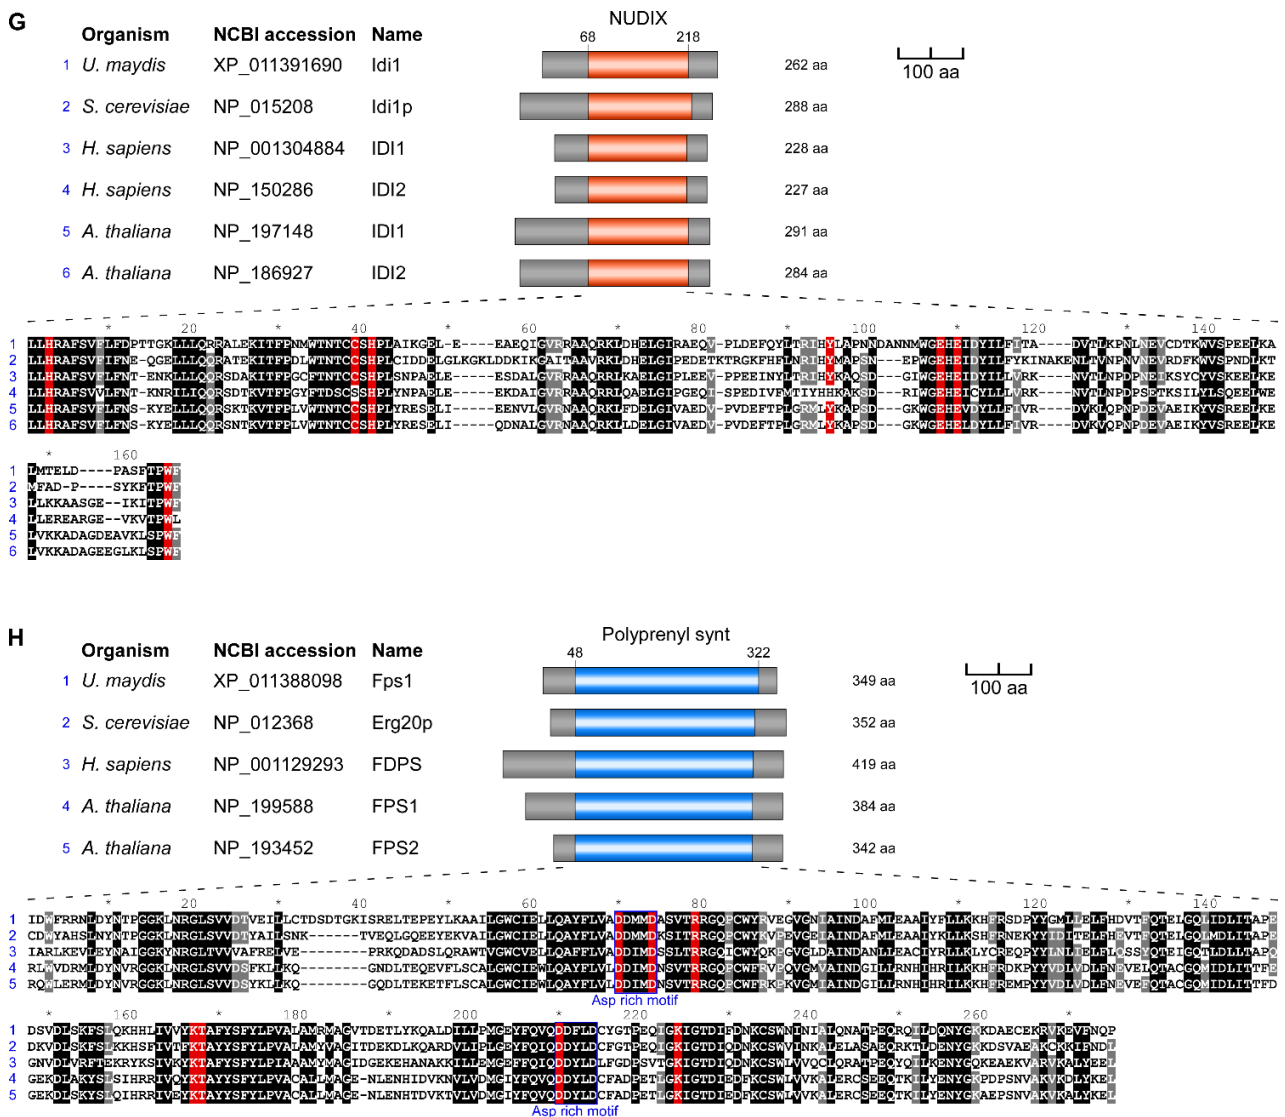

**Supplementary Figure S4. Bioinformatics analysis of *U. maydis* biosynthetic enzymes.**

(G-H) Amino acid sequence comparison of isopentenyl diphosphate isomerases (G, active site from *H. sapiens*; Zheng et al. 2007 *J. Mol. Biol.* 366:1447) and farnesyl diphosphate synthase/dimethylallyl transtransferases (H, active site from *H. sapiens*; Kavanagh et al. 2006 *PNAS* 103:7829) as shown in (A; NUDIX, PF00293; Polyprenyl synt, PF00348). End of figure.

## Novel production host for sesquiterpenoids

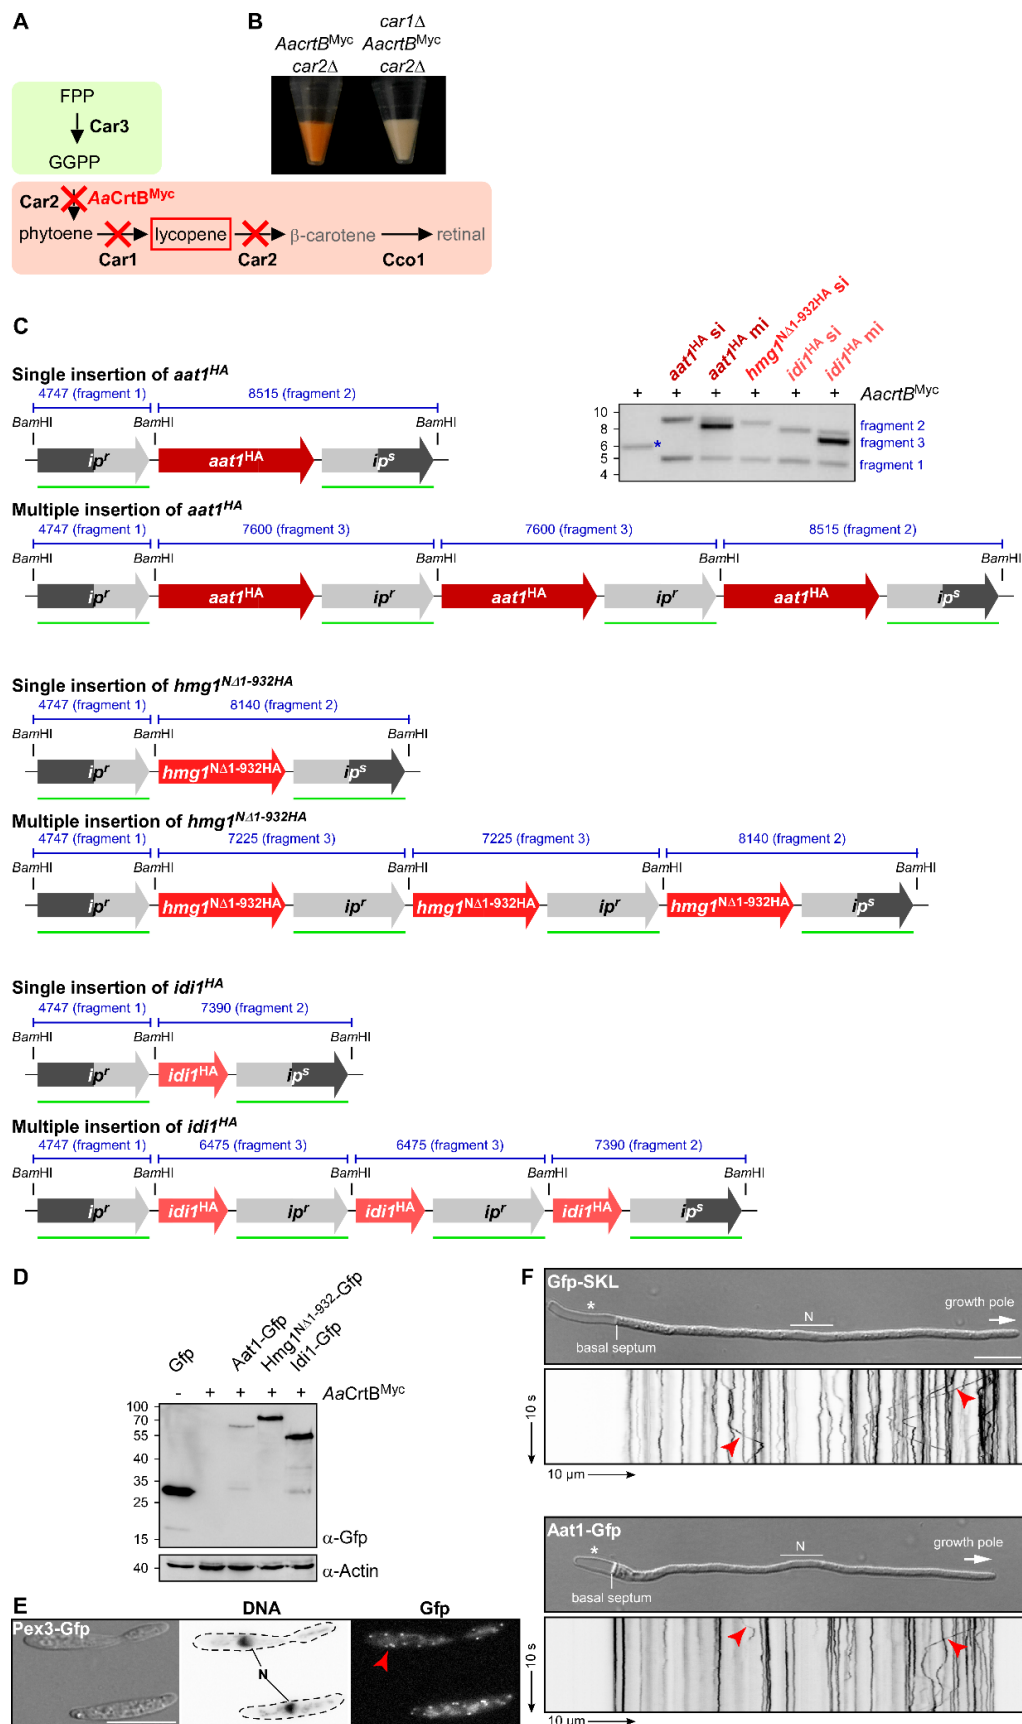

Supplementary Figure S2. Aat1 localises to motile peroxisomes during hyphal growth.

## Novel production host for sesquiterpenoids

(A) Schematic representation of the carotenoid module given in Figure 1 (red cross indicates gene deletion). (B) Cell pellets of strains indicated above the image. (C) Graphical representation of the genetic modification at the *ip<sup>s</sup>* locus encoding an iron sulfur protein conferring carboxin resistance. The expected gene structure for *aat1<sup>HA</sup>*, *hmg1<sup>NΔ1-932HA</sup>* and *idi1<sup>HA</sup>* are given. Single and multiple insertions are compared. For the sake of clarity, the Southern Blot shown in Figure 3B is given in the right upper corner. The wild type (*wt*) version encoding a sensitive version *ip<sup>s</sup>* is given in dark grey. The corresponding resistant version is given in light grey (*ip<sup>r</sup>*). The expected fragments are given in blue. Note, that due to the repetition during multiple insertion, the intensity of fragment 3 is always the strongest. The probe used for hybridisation is indicated as a green line. (D) Western blot analysis of strains indicated above the lanes. The expected molecular weight is 70 kDa for Aat1-Gfp, 81 kDa for Hmg1<sup>NΔ1-932</sup>-Gfp, 57 kDa for Idi1-Gfp, 37 kDa for AaCrtB<sup>Myc</sup> and 57 kDa for actin (UMAG\_11232). Antibodies are given in the lower right corner (size marker in kDa given on the left). Note, that the AaCrtB<sup>Myc</sup> producing strains carried a deletion of *car2*. (E) Microscopic analysis showing DIC image of fixed cells on the left (size bar, 10 μm). Corresponding staining of nuclear DNA with Hoechst 33342 (middle panel; N, nucleus, inverted image) and green fluorescence (Gfp) on the right (red arrowheads indicate peroxisomes). (F) Microscopic analysis showing DIC images of AB33 hyphae (6 h.p.i.) on top (size bar, 10 μm; N, nucleus) and corresponding kymographs at the bottom; genetic background as indicated (arrow length on the left and bottom indicates time and distance, respectively). Bidirectional movement of peroxisomes is visible as diagonal lines (red arrowheads).



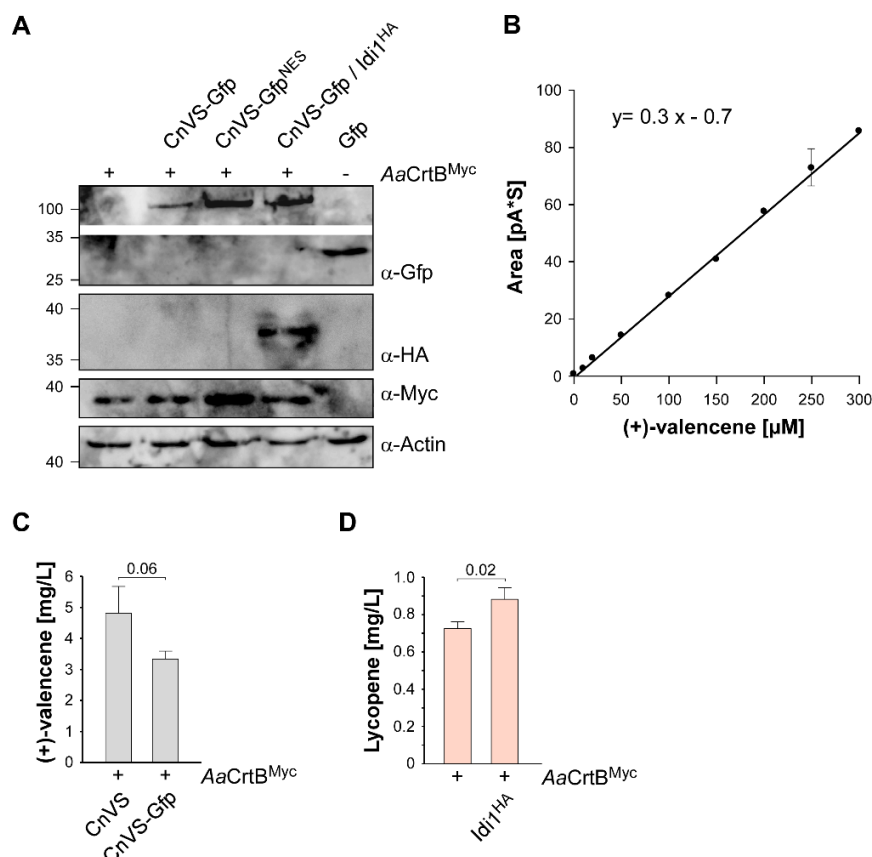

**Supplementary Figure S3. Production of (+)-valencene synthase CnVS in *U. maydis*.**

(A) Western blot analysis of strains indicated above the lanes. The expected molecular weight is 96 kDa for CnVS-Gfp, 97 kDa for CnVS-Gfp<sup>NES</sup>, 27 kDa for Gfp, 37 kDa for AaCrtB<sup>Myc</sup> and 42 kDa for actin (UMAG\_11232). Antibodies are given in the lower right corner (size marker in kDa given on the left). Note, that the AaCrtB<sup>Myc</sup> producing strain carried a deletion of *car2*. (B) Standard calibration curve of the peaks derived from GC-FID measurements versus (+)-valencene concentrations. (C) Concentrations of (+)-valencene in the *n*-dodecane samples were determined based on the calibration curve with the commercial reference compound used in (B). Three independent biological experiments (n=3) were carried out. Error bars indicate standard deviation of the mean (SD). Statistical significance was calculated using the unpaired two-tailed *t* test and *p*-values were indicated above. Note, that the AaCrtB<sup>Myc</sup> producing strains carried a deletion of *car2*. (D) Lycopene concentrations in strains given at the bottom. Three independent biological experiments (n=3) were carried out. Error bars indicate standard deviation of the mean (SD). Statistical significance was calculated using the unpaired two-tailed *t* test and *p*-values were indicated above. Note, that the AaCrtB<sup>Myc</sup> producing strains carried a deletion of *car2*.

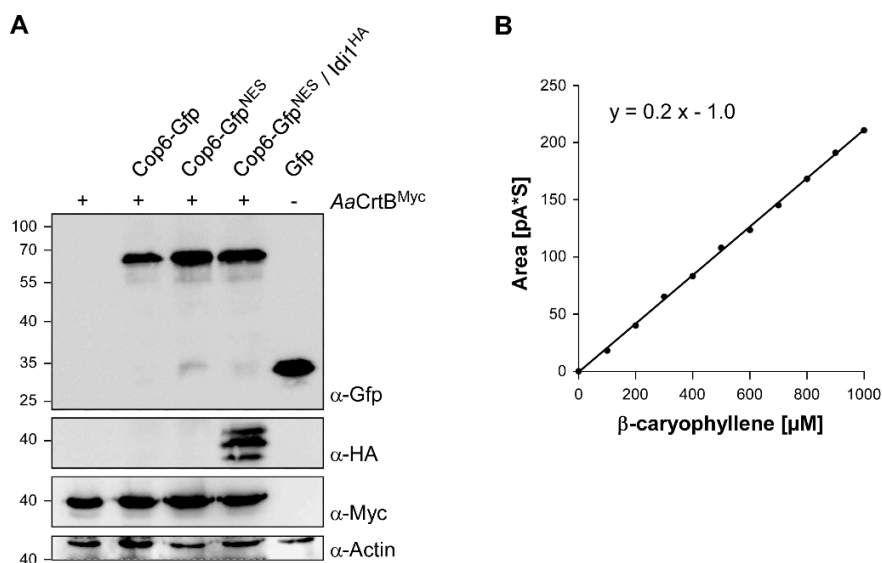

**Supplementary Figure S4. Heterologous production of Cop6 in *U. maydis*.**

(A) Western blot analysis of strains indicated above the lanes. The expected molecular weight is 65 kDa for Cop6-Gfp, 66 kDa for Cop6-Gfp<sup>NES</sup>, 27 kDa for Gfp, 37 kDa for AaCrtB<sup>Myc</sup> and 42 kDa for actin (UMAG\_11232). Antibodies are given in the lower right corner (size marker in kDa given on the left). Note, that the AaCrtB<sup>Myc</sup> producing strains carried a deletion of *car2*. (B) Standard calibration curve of the peaks derived from GC-FID measurements versus the chemically similar compound  $\beta$ -caryophyllene.



Supplementary Table S1: Description of *U. maydis* strains used in this study

| Strain                                                                    | Locus                                | Progenitor strain                           | Short description                                                                                                                                                                                                                                                                                                                                    |
|---------------------------------------------------------------------------|--------------------------------------|---------------------------------------------|------------------------------------------------------------------------------------------------------------------------------------------------------------------------------------------------------------------------------------------------------------------------------------------------------------------------------------------------------|
| AB33                                                                      | <i>b</i>                             | FB2                                         | <i>Pnar:bW2bE1</i> , production of active <i>b</i> heterodimer under control of the <i>P<sub>nar1</sub></i> promoter; strain grows filamentously upon changing the nitrogen source. Published in (Brachmann, 2001).                                                                                                                                  |
| AB33car2Δ_HygR                                                            | <i>car2</i>                          | AB33                                        | Carrying a deletion of <i>car2</i> and possessing hygromycin B resistance.                                                                                                                                                                                                                                                                           |
| AB33car2Δ/AacrtB <sup>Myc</sup> _NatR                                     | <i>car2</i>                          | AB33car2Δ_HygR                              | Carrying a deletion of <i>car2</i> and producing codon-optimized <i>AaCrtB</i> , which is C-terminally fused to 3× Myc tag at the <i>car2</i> locus. Possessing nourseothricin resistance.                                                                                                                                                           |
| AB33car2Δ/AacrtB <sup>Myc</sup> _NatR/<br>car1Δ_HygR                      | <i>car2</i><br><i>car1</i>           | AB33car2Δ/AacrtB <sup>Myc</sup> _NatR       | Carrying deletions of <i>car2</i> and <i>car1</i> and producing codon-optimized <i>AaCrtB</i> , which is C-terminally fused to 3× Myc tag at the <i>car2</i> locus. Possessing nourseothricin and hygromycin B resistance.                                                                                                                           |
| AB33car2Δ/AacrtB <sup>Myc</sup> _NatR/<br>aat1 <sup>HA</sup> _CbxR        | <i>car2</i><br><i>ip<sup>s</sup></i> | AB33car2Δ/AacrtB <sup>Myc</sup> _NatR       | Carrying a deletion of <i>car2</i> and co-producing codon-optimized <i>AaCrtB</i> , which is C-terminally fused to 3× Myc tag at the <i>car2</i> locus, and Aat1 N-terminally fused to 3× HA tag at the <i>ip<sup>s</sup></i> locus. Possessing nourseothricin and carboxin resistance.                                                              |
| AB33car2Δ/AacrtB <sup>Myc</sup> _NatR/<br>hmg1 <sup>NA1-932HA</sup> _CbxR | <i>car2</i><br><i>ip<sup>s</sup></i> | AB33car2Δ/AacrtB <sup>Myc</sup> _NatR       | Carrying a deletion of <i>car2</i> and co-producing codon-optimized <i>AaCrtB</i> , which is C-terminally fused to 3× Myc tag at the <i>car2</i> locus, and N-terminally truncated from aa 1 to 932 version of Hmg1, which is N-terminally fused to 3× HA tag at the <i>ip<sup>s</sup></i> locus. Possessing nourseothricin and carboxin resistance. |
| AB33car2Δ/AacrtB <sup>Myc</sup> _NatR/<br>idi1 <sup>HA</sup> _CbxR        | <i>car2</i><br><i>ip<sup>s</sup></i> | AB33car2Δ/AacrtB <sup>Myc</sup> _NatR       | Carrying a deletion of <i>car2</i> and co-producing codon-optimized <i>AaCrtB</i> , which is C-terminally fused to 3× Myc tag at the <i>car2</i> locus, and Idi1 N-terminally fused to 3× HA tag at the <i>ip<sup>s</sup></i> locus. Possessing nourseothricin and carboxin resistance.                                                              |
| AB33car2Δ/AacrtB <sup>Myc</sup> _NatR/<br>aat1G_CbxR                      | <i>car2</i><br><i>ip<sup>s</sup></i> | AB33car2Δ/AacrtB <sup>Myc</sup> _NatR       | Carrying a deletion of <i>car2</i> and co-producing codon-optimized <i>AaCrtB</i> , which is C-terminally fused to 3× Myc tag at the <i>car2</i> locus, and Aat1 N-terminally fused to eGfp at the <i>ip<sup>s</sup></i> locus. Possessing nourseothricin and carboxin resistance.                                                                   |
| AB33car2Δ/AacrtB <sup>Myc</sup> _NatR/<br>hmg1 <sup>NA1-932</sup> G_CbxR  | <i>car2</i><br><i>ip<sup>s</sup></i> | AB33car2Δ/AacrtB <sup>Myc</sup> _NatR       | Carrying a deletion of <i>car2</i> and co-producing codon-optimized <i>AaCrtB</i> , which is C-terminally fused to 3× Myc tag at the <i>car2</i> locus, and N-terminally truncated from aa 1 to 932 version of Hmg1, which is N-terminally fused to eGfp at the <i>ip<sup>s</sup></i> locus. Possessing nourseothricin and carboxin resistance.      |
| AB33car2Δ/AacrtB <sup>Myc</sup> _NatR/<br>idi1G_CbxR                      | <i>car2</i><br><i>ip<sup>s</sup></i> | AB33car2Δ/AacrtB <sup>Myc</sup> _NatR       | Carrying a deletion of <i>car2</i> and co-producing codon-optimized <i>AaCrtB</i> , which is C-terminally fused to 3× Myc tag at the <i>car2</i> locus and Idi1 N-terminally fused to eGfp at the <i>ip<sup>s</sup></i> locus. Possessing nourseothricin and carboxin resistance.                                                                    |
| AB33egfp_CbxR                                                             | <i>ip<sup>s</sup></i>                | AB33                                        | The <i>egfp</i> construct is ectopically integrated into the <i>ip<sup>s</sup></i> locus. Possessing nourseothricin and carboxin resistance. Published in (Köpke, 2011).                                                                                                                                                                             |
| AB33upa9mC_HygR/<br>egfp-sk1_CbxR                                         | <i>upa9</i><br><i>ip<sup>s</sup></i> | AB33egfp-sk1_CbxR                           | Co-producing eGfp containing SKL at the C-terminus at the <i>ip<sup>s</sup></i> locus and Upa9 C-terminally fused to eGfp at the <i>upa9</i> locus. Upa9 is the homolog of Pex3.                                                                                                                                                                     |
| AB33pab1mC_HygR/<br>upa9G_NatR                                            | <i>pab1</i><br><i>upa9</i>           | AB33pab1mC                                  | Co-producing Pab1 C-terminally fused to mCherry at the <i>pab1</i> locus and Upa9 C-terminally fused to eGfp at the <i>upa9</i> locus. Possessing hygromycin B and carboxin resistance.                                                                                                                                                              |
| AB33car2Δ/AacrtB <sup>Myc</sup>                                           | <i>car2</i>                          | AB33car2Δ/AacrtB <sup>Myc</sup> _NatR       | Carrying a deletion of <i>car2</i> and producing codon-optimized <i>AaCrtB</i> , which is C-terminally fused to 3× Myc tag at the <i>car2</i> locus. Nourseothricin resistance gene cassette is recycled via FRTm7                                                                                                                                   |
| AB33car2Δ/AacrtB <sup>Myc</sup> /<br>cco1Δ_HygR                           | <i>car2</i><br><i>cco1</i>           | AB33car2Δ/AacrtB <sup>Myc</sup>             | Carrying deletions of <i>car2</i> and <i>cco1</i> and producing codon-optimized <i>AaCrtB</i> , which is C-terminally fused to 3× Myc tag at the <i>car2</i> locus. Nourseothricin resistance gene cassette is recycled via FRTm7 and possessing hygromycin B resistance.                                                                            |
| AB33car2Δ/AacrtB <sup>Myc</sup> /cco1Δ/<br>idi1 <sup>HA</sup> _NatR       | <i>car2</i><br><i>cco1</i>           | AB33car2Δ/AacrtB <sup>Myc</sup> /cco1Δ_HygR | Carrying deletions of <i>car2</i> and <i>cco1</i> and co-producing codon-optimized <i>AaCrtB</i> , which is C-terminally fused to 3× Myc tag at the <i>car2</i> locus, and Idi1 N-terminally fused to 3× HA tag at the <i>cco1</i> locus. Possessing nourseothricin resistance.                                                                      |

## Novel production host for sesquiterpenoids

|                                                                                                |                                           |                                                                           |                                                                                                                                                                                                                                                                                                                                                                                                      |
|------------------------------------------------------------------------------------------------|-------------------------------------------|---------------------------------------------------------------------------|------------------------------------------------------------------------------------------------------------------------------------------------------------------------------------------------------------------------------------------------------------------------------------------------------------------------------------------------------------------------------------------------------|
| AB33car2Δ/AacrB <sup>Myc</sup> /cco1Δ/<br>idi1 <sup>HA</sup>                                   | <i>car2</i><br><i>cco1</i>                | AB33car2Δ/AacrB <sup>Myc</sup> /cco1Δ/<br>/idi1 <sup>HA</sup> _NatR       | Carrying deletions of <i>car2</i> and <i>cco1</i> and co-producing codon-optimized <i>AaCrtB</i> , which is C-terminally fused to 3× Myc tag at the <i>car2</i> locus, and Idi1 N-terminally fused to 3× HA tag at the <i>cco1</i> locus. Nourseothricin resistance gene cassette is recycled via FRTm1.                                                                                             |
| AB33car2Δ/AacrB <sup>Myc</sup> /cco1Δ/<br>idi1 <sup>HA</sup> /upp3Δ_HygR                       | <i>car2</i><br><i>cco1</i>                | AB33car2Δ/AacrB <sup>Myc</sup> /cco1Δ/<br>/idi1 <sup>HA</sup>             | Carrying deletions of <i>car2</i> , <i>cco1</i> , and <i>upp3</i> , and co-producing codon-optimized <i>AaCrtB</i> , which is C-terminally fused to 3× Myc tag at the <i>car2</i> locus, and Idi1 N-terminally fused to 3× HA tag at the <i>cco1</i> locus. Possessing hygromycin B resistance.                                                                                                      |
| AB33upp3Δ/egfp_NatR                                                                            | <i>upp3</i>                               | AB33upp3Δ_HygR                                                            | Carrying a deletion of <i>upp3</i> and producing eGfp at the <i>upp3</i> locus. Possessing nourseothricin resistance.                                                                                                                                                                                                                                                                                |
| AB33car2Δ/AacrB <sup>Myc</sup> /<br>upp3Δ_HygR                                                 | <i>car2</i><br><i>upp3</i>                | AB33car2Δ/AacrB <sup>Myc</sup>                                            | Carrying deletions of <i>car2</i> and <i>upp3</i> and producing codon-optimized <i>AaCrtB</i> , which is C-terminally fused to 3× Myc tag at the <i>car2</i> locus. Possessing hygromycin B resistance                                                                                                                                                                                               |
| AB33car2Δ/AacrB <sup>Myc</sup> /upp3Δ/<br>CnVS_NatR                                            | <i>car2</i><br><i>upp3</i>                | AB33car2Δ/AacrB <sup>Myc</sup> /upp3Δ<br>_HygR                            | Carrying deletions of <i>car2</i> and <i>upp3</i> and co-producing codon-optimized <i>AaCrtB</i> , which is C-terminally fused to 3× Myc tag at the <i>car2</i> locus, and dicodon-optimized CnVS at the <i>upp3</i> locus. Possessing nourseothricin resistance.                                                                                                                                    |
| AB33car2Δ/AacrB <sup>Myc</sup> /upp3Δ/<br>CnVSG_NatR                                           | <i>car2</i><br><i>upp3</i>                | AB33car2Δ/AacrB <sup>Myc</sup> /upp3Δ<br>_HygR                            | Carrying deletions of <i>car2</i> and <i>upp3</i> and co-producing codon-optimized <i>AaCrtB</i> , which is C-terminally fused to 3× Myc tag at the <i>car2</i> locus, and dicodon-optimized CnVS, which is N-terminally fused to eGfp at the <i>upp3</i> locus. Possessing nourseothricin resistance.                                                                                               |
| AB33car2Δ/AacrB <sup>Myc</sup> /upp3Δ/<br>CnVSG <sup>NES</sup> _NatR                           | <i>car2</i><br><i>upp3</i>                | AB33car2Δ/AacrB <sup>Myc</sup> /upp3Δ<br>_HygR                            | Carrying deletions of <i>car2</i> and <i>upp3</i> and co-producing codon-optimized <i>AaCrtB</i> , which is C-terminally fused to 3× Myc tag at the <i>car2</i> locus, and dicodon-optimized CnVS, which is N-terminally fused to eGfp <sup>NES</sup> at the <i>upp3</i> locus. Possessing nourseothricin resistance.                                                                                |
| AB33car2Δ/AacrB <sup>Myc</sup> /cco1Δ/<br>idi1 <sup>HA</sup> /upp3Δ/CnVSG <sup>NES</sup> _NatR | <i>car2</i><br><i>cco1</i><br><i>upp3</i> | AB33car2Δ/AacrB <sup>Myc</sup> /cco1Δ/<br>/idi1 <sup>HA</sup> /upp3Δ_HygR | Carrying deletions of <i>car2</i> , <i>cco1</i> , and <i>upp3</i> and co-producing codon-optimized <i>AaCrtB</i> , which is C-terminally fused to 3× Myc tag at the <i>car2</i> locus, Idi1 N-terminally fused to 3× HA tag at the <i>cco1</i> locus, and dicodon-optimized CnVS, which is N-terminally fused to eGfp <sup>NES</sup> at the <i>upp3</i> locus. Possessing nourseothricin resistance. |
| AB33car2Δ/AacrB <sup>Myc</sup> /upp3Δ/<br>cop6_NatR                                            | <i>car2</i><br><i>upp3</i>                | AB33car2Δ/AacrB <sup>Myc</sup> /upp3Δ<br>_HygR                            | Carrying deletions of <i>car2</i> and <i>upp3</i> and co-producing codon-optimized <i>AaCrtB</i> , which is C-terminally fused to 3× Myc tag at the <i>car2</i> locus, and dicodon-optimized Cop6 at the <i>upp3</i> locus. Possessing nourseothricin resistance.                                                                                                                                    |
| AB33car2Δ/AacrB <sup>Myc</sup> /upp3Δ/<br>cop6G_NatR                                           | <i>car2</i><br><i>upp3</i>                | AB33car2Δ/AacrB <sup>Myc</sup> /upp3Δ<br>_HygR                            | Carrying deletions of <i>car2</i> and <i>upp3</i> and co-producing codon-optimized <i>AaCrtB</i> , which is C-terminally fused to 3× Myc tag at the <i>car2</i> locus, and dicodon-optimized Cop6, which is N-terminally fused to eGfp at the <i>upp3</i> locus. Possessing nourseothricin resistance.                                                                                               |
| AB33car2Δ/AacrB <sup>Myc</sup> /upp3Δ/<br>cop6G <sup>NES</sup> _NatR                           | <i>car2</i><br><i>upp3</i>                | AB33car2Δ/AacrB <sup>Myc</sup> /upp3Δ<br>_HygR                            | Carrying deletions of <i>car2</i> and <i>upp3</i> and co-producing codon-optimized <i>AaCrtB</i> , which is C-terminally fused to 3× Myc tag at the <i>car2</i> locus and dicodon-optimized Cop6, which is N-terminally fused to eGfp <sup>NES</sup> at the <i>upp3</i> locus. Possessing nourseothricin resistance.                                                                                 |
| AB33car2Δ/AacrB <sup>Myc</sup> /cco1Δ/<br>idi1 <sup>HA</sup> /upp3Δ/cop6G <sup>NES</sup> _NatR | <i>car2</i><br><i>cco1</i><br><i>upp3</i> | AB33car2Δ/AacrB <sup>Myc</sup> /cco1Δ/<br>/idi1 <sup>HA</sup> /upp3Δ_HygR | Carrying deletions of <i>car2</i> , <i>cco1</i> , and <i>upp3</i> and co-producing codon-optimized <i>AaCrtB</i> , which is C-terminally fused to 3× Myc tag at the <i>car2</i> locus, Idi1 N-terminally fused to 3× HA tag at the <i>cco1</i> locus, and dicodon-optimized Cop6, which is N-terminally fused to eGfp <sup>NES</sup> at the <i>upp3</i> locus. Possessing nourseothricin resistance. |

Supplementary Table S2: Generation of *U. maydis* strains used in this study

| Strain                                                                                                     | Relevant genotype                                              | UMa  | Reference       | Transformed plasmid (pUMa)                              | Locus                 | Progenitor strain                                                                     |
|------------------------------------------------------------------------------------------------------------|----------------------------------------------------------------|------|-----------------|---------------------------------------------------------|-----------------------|---------------------------------------------------------------------------------------|
| AB33                                                                                                       | <i>a2 Pnar::bW2bE1</i>                                         | 133  | Brachmann, 2001 | pAB33                                                   | <i>b</i>              | FB2                                                                                   |
| AB33car2Δ_HygR                                                                                             | <i>car2Δ</i>                                                   | 2290 | This study      | pCar2Δ_HygR <sup>FRT</sup> (pUMa3287)                   | <i>car2</i>           | AB33                                                                                  |
| AB33car2Δ/AacrB <sup>Myc</sup> _NatR                                                                       | <i>car2Δ/AacrB</i>                                             | 2612 | This study      | pAacrB <sup>Myc</sup> _NatR <sup>FRTm7</sup> (pUMa3707) | <i>car2</i>           | AB33car2Δ_HygR                                                                        |
| AB33car2Δ/AacrB <sup>Myc</sup> _NatR/ <i>car1Δ</i> _HygR                                                   | <i>car2Δ/AacrB/<i>car1Δ</i></i>                                | 3246 | This study      | pCar1Δ_HygR <sup>FRT</sup> (pUMa3286)                   | <i>car1</i>           | AB33car2Δ/AacrB <sup>Myc</sup> _NatR                                                  |
| AB33car2Δ/AacrB <sup>Myc</sup> _NatR/ <i>aat1</i> <sup>HA</sup> _CbxR                                      | <i>car2Δ/AacrB/<i>aat1</i></i>                                 | 2706 | This study      | pAat1 <sup>HA</sup> _CbxR (pUMa3379)                    | <i>ip<sup>s</sup></i> | AB33car2Δ/AacrB <sup>Myc</sup> _NatR                                                  |
| AB33car2Δ/AacrB <sup>Myc</sup> _NatR/ <i>hmg1</i> <sup>NA1-932HA</sup> _CbxR                               | <i>car2Δ/AacrB/<i>hmg1</i><sup>NA1-932</sup></i>               | 2707 | This study      | pHmg1 <sup>NA1-932</sup> _CbxR (pUMa3381)               | <i>ip<sup>s</sup></i> | AB33car2Δ/AacrB <sup>Myc</sup> _NatR                                                  |
| AB33car2Δ/AacrB <sup>Myc</sup> _NatR/ <i>idi1</i> <sup>HA</sup> _CbxR                                      | <i>car2Δ/AacrB/<i>idi1</i></i>                                 | 2708 | This study      | pIdi1 <sup>HA</sup> _CbxR (pUMa3382)                    | <i>ip<sup>s</sup></i> | AB33car2Δ/AacrB <sup>Myc</sup> _NatR                                                  |
| AB33car2Δ/AacrB <sup>Myc</sup> _NatR/ <i>aat1G</i> _CbxR                                                   | <i>car2Δ/AacrB/<i>aat1G</i></i>                                | 3065 | This study      | pAat1G_CbxR (pUMa4230)                                  | <i>ip<sup>s</sup></i> | AB33car2Δ/AacrB <sup>Myc</sup> _NatR                                                  |
| AB33car2Δ/AacrB <sup>Myc</sup> _NatR/ <i>hmg1</i> <sup>NA1-932G</sup> _CbxR                                | <i>car2Δ/AacrB/<i>hmg1</i><sup>NA1-932</sup></i>               | 3066 | This study      | pHmg1 <sup>NA1-932G</sup> _CbxR (pUMa4231)              | <i>ip<sup>s</sup></i> | AB33car2Δ/AacrB <sup>Myc</sup> _NatR                                                  |
| AB33car2Δ/AacrB <sup>Myc</sup> _NatR/ <i>idi1G</i> _CbxR                                                   | <i>car2Δ/AacrB/<i>idi1G</i></i>                                | 3067 | This study      | pIdi1G_CbxR (pUMa4232)                                  | <i>ip<sup>s</sup></i> | AB33car2Δ/AacrB <sup>Myc</sup> _NatR                                                  |
| AB33egfp_CbxR                                                                                              | <i>egfp</i>                                                    | 2229 | Köpke, 2011     | peGfp_CbxR (pUMa1139)                                   | <i>ip<sup>s</sup></i> | AB33                                                                                  |
| AB33upa9mC_HygR/ <i>egfp-skl</i> _CbxR                                                                     | <i>upa9mC/egfp-skl</i>                                         | 2386 | This study      | pUpa9mC_HygR (pUMa2722)                                 | <i>upa9</i>           | AB33egfp-skl_CbxR                                                                     |
| AB33pab1mC_HygR/ <i>upa9G</i> _NatR                                                                        | <i>pab1mC/upa9G</i>                                            | 1951 | This study      | pUpa9G_NatR (pUMa2938)                                  | <i>upa9</i>           | AB33pab1mC                                                                            |
| AB33car2Δ/AacrB <sup>Myc</sup>                                                                             | <i>car2Δ/AacrB</i>                                             | 2775 | This study      | pFLPexpC (pUMa1446)                                     | <i>car2</i>           | AB33car2Δ/AacrB <sup>Myc</sup> _NatR                                                  |
| AB33car2Δ/AacrB <sup>Myc</sup> / <i>cco1Δ</i> _HygR                                                        | <i>car2Δ/AacrB/<i>cco1Δ</i></i>                                | 2785 | This study      | pCco1Δ_HygR (pUMa3281)                                  | <i>cco1</i>           | AB33car2Δ/AacrB <sup>Myc</sup>                                                        |
| AB33car2Δ/AacrB <sup>Myc</sup> / <i>cco1Δ/idi1</i> <sup>HA</sup> _NatR                                     | <i>car2Δ/AacrB/<i>cco1Δ/idi1</i></i>                           | 3025 | This study      | pIdi1 <sup>HA</sup> _NatR <sup>FRTm1</sup> (pUMa4082)   | <i>cco1</i>           | AB33car2Δ/AacrB <sup>Myc</sup> / <i>cco1Δ</i> _HygR                                   |
| AB33car2Δ/AacrB <sup>Myc</sup> / <i>cco1Δ/idi1</i> <sup>HA</sup>                                           | <i>car2Δ/AacrB/<i>cco1Δ/idi1</i></i>                           | 3077 | This study      | pFLPexpC (pUMa1446)                                     | <i>cco1</i>           | AB33car2Δ/AacrB <sup>Myc</sup> / <i>cco1Δ/idi1</i> <sup>HA</sup> _NatR                |
| AB33car2Δ/AacrB <sup>Myc</sup> / <i>cco1Δ/idi1</i> <sup>HA</sup> / <i>upp3Δ</i> _HygR                      | <i>car2Δ/AacrB/<i>cco1Δ/idi1/upp3Δ</i></i>                     | 3131 | This study      | pUpp3Δ_HygR <sup>FRTm3</sup> (pUMa1556)                 | <i>upp3</i>           | AB33car2Δ/AacrB <sup>Myc</sup> / <i>cco1Δ/idi1</i> <sup>HA</sup>                      |
| AB33upp3Δ/ <i>egfp</i> _NatR                                                                               | <i>upp3Δ/egfp</i>                                              | 2179 | This study      | peGfp_NatR (pUMa3132)                                   | <i>upp3</i>           | AB33upp3Δ_HygR                                                                        |
| AB33car2Δ/AacrB <sup>Myc</sup> / <i>upp3Δ</i> _HygR                                                        | <i>car2Δ/AacrB/<i>upp3Δ</i></i>                                | 2884 | This study      | pUpp3Δ_HygR <sup>FRTm3</sup> (pUMa1556)                 | <i>upp3</i>           | AB33car2Δ/AacrB <sup>Myc</sup>                                                        |
| AB33car2Δ/AacrB <sup>Myc</sup> / <i>upp3Δ/CnVS</i> _NatR                                                   | <i>car2Δ/AacrB/<i>upp3Δ/CnVS</i></i>                           | 3194 | This study      | pCnVS_NatR <sup>FRTm2</sup> (pUMa4500)                  | <i>upp3</i>           | AB33car2Δ/AacrB <sup>Myc</sup> / <i>upp3Δ</i> _HygR                                   |
| AB33car2Δ/AacrB <sup>Myc</sup> / <i>upp3Δ/CnVSG</i> _NatR                                                  | <i>car2Δ/AacrB/<i>upp3Δ/CnVSG</i></i>                          | 3104 | This study      | pCnVSG_NatR <sup>FRTm2</sup> (pUMa4356)                 | <i>upp3</i>           | AB33car2Δ/AacrB <sup>Myc</sup> / <i>upp3Δ</i> _HygR                                   |
| AB33car2Δ/AacrB <sup>Myc</sup> / <i>upp3Δ/CnVSG</i> <sup>NES</sup> _NatR                                   | <i>car2Δ/AacrB/<i>upp3Δ/CnVSG</i><sup>NES</sup></i>            | 3192 | This study      | pCnVSG <sup>NES</sup> _NatR <sup>FRTm2</sup> (pUMa4499) | <i>upp3</i>           | AB33car2Δ/AacrB <sup>Myc</sup> / <i>upp3Δ</i> _HygR                                   |
| AB33car2Δ/AacrB <sup>Myc</sup> / <i>cco1Δ/idi1</i> <sup>HA</sup> / <i>upp3Δ/CnVSG</i> <sup>NES</sup> _NatR | <i>car2Δ/AacrB/<i>cco1Δ/idi1/upp3Δ/CnVSG</i><sup>NES</sup></i> | 3195 | This study      | pCnVSG <sup>NES</sup> _NatR <sup>FRTm2</sup> (pUMa4499) | <i>upp3</i>           | AB33car2Δ/AacrB <sup>Myc</sup> / <i>cco1Δ/idi1</i> <sup>HA</sup> / <i>upp3Δ</i> _HygR |
| AB33car2Δ/AacrB <sup>Myc</sup> / <i>upp3Δ/cop6</i> _NatR                                                   | <i>car2Δ/AacrB/<i>upp3Δ/cop6</i></i>                           | 3193 | This study      | pCop6_NatR <sup>FRTm2</sup> (pUMa4496)                  | <i>upp3</i>           | AB33car2Δ/AacrB <sup>Myc</sup> / <i>upp3Δ</i> _HygR                                   |
| AB33car2Δ/AacrB <sup>Myc</sup> / <i>upp3Δ/cop6G</i> _NatR                                                  | <i>car2Δ/AacrB/<i>upp3Δ/cop6G</i></i>                          | 2944 | This study      | pCop6G_NatR <sup>FRTm2</sup> (pUMa4089)                 | <i>upp3</i>           | AB33car2Δ/AacrB <sup>Myc</sup> / <i>upp3Δ</i> _HygR                                   |
| AB33car2Δ/AacrB <sup>Myc</sup> / <i>upp3Δ/cop6G</i> <sup>NES</sup> _NatR                                   | <i>car2Δ/AacrB/<i>upp3Δ/cop6G</i><sup>NES</sup></i>            | 3078 | This study      | pCop6G <sup>NES</sup> _NatR <sup>FRTm2</sup> (pUMa4316) | <i>upp3</i>           | AB33car2Δ/AacrB <sup>Myc</sup> / <i>upp3Δ</i> _HygR                                   |
| AB33car2Δ/AacrB <sup>Myc</sup> / <i>cco1Δ/idi1</i> <sup>HA</sup> / <i>upp3Δ/cop6G</i> <sup>NES</sup> _NatR | <i>car2Δ/AacrB/<i>cco1Δ/idi1/upp3Δ/cop6G</i><sup>NES</sup></i> | 3148 | This study      | pCop6G <sup>NES</sup> _NatR <sup>FRTm2</sup> (pUMa4316) | <i>upp3</i>           | AB33car2Δ/AacrB <sup>Myc</sup> / <i>cco1Δ/idi1</i> <sup>HA</sup> / <i>upp3Δ</i> _HygR |

Supplementary Table S3: Description of plasmids used for *U. maydis* strains generation

| Plasmid name                                  | pUMa | Resistance cassette                                     | Short description                                                                                                                                                                                                                                                                                                                                                                                                                                                                       |
|-----------------------------------------------|------|---------------------------------------------------------|-----------------------------------------------------------------------------------------------------------------------------------------------------------------------------------------------------------------------------------------------------------------------------------------------------------------------------------------------------------------------------------------------------------------------------------------------------------------------------------------|
| pCco1Δ_HygR                                   | 3281 | <i>Sfi</i> I-insert MF1hs                               | Plasmid for generating deletion mutants of <i>cco1</i> . The hygromycin B resistance cassette contains FRT sites (GAAGTTCCTATTCTCTAGAAA GTATAGGAAGCTTC) at both ends for recycling by Flp recombinase. The cassette is flanked by the regions, 1.1 kb upstream and 0.8 kb downstream of <i>cco1</i> . The flanking regions were amplified by PCR using oMB981/oMB982 and oMB983/oMB984 and UM521 wild type DNA as template.                                                             |
| pCar1Δ_HygR                                   | 3286 | <i>Sfi</i> I-insert MF1hs                               | Plasmid for generating deletion mutants of <i>car1</i> . The hygromycin B resistance cassette contains FRT sites at both ends for recycling by Flp recombinase. The cassette is flanked by the regions, 0.9 kb upstream and 0.6 kb downstream of <i>car1</i> . The flanking regions were amplified by PCR using oUP134/oMB998 and oMB999/oUP009 and UM521 wild type DNA as template.                                                                                                    |
| pCar2Δ_HygR                                   | 3287 | <i>Sfi</i> I-insert MF1hs                               | Plasmid for generating deletion mutants of <i>car2</i> . The hygromycin B resistance cassette contains FRT sites at both ends for recycling by Flp recombinase. The cassette is flanked by the regions, 0.9 kb upstream and 0.9 kb downstream of <i>car2</i> . The flanking regions were amplified by PCR using oUP014/oUP015 and oUP016/oUP017 and UM521 wild type DNA as template.                                                                                                    |
| pUpp3Δ_HygR                                   | 1556 | <i>Sfi</i> I-insert MF1hs                               | Plasmid for generating deletion mutants of <i>upp3</i> . The hygromycin B resistance cassette contains FRTm3 sites (GAAGTTCCTATTCTCCAGA AAGTATAGGAAGCTTC) at both ends for recycling by Flp recombinase. The cassette is flanked by the regions, 1.5 kb upstream and 1.9 kb downstream of <i>upp3</i> . The flanking regions were amplified by PCR using UM521 wild type as template. Published (Sarkari, 2014).                                                                        |
| pFLPexpC                                      | 1446 | CbxR                                                    | Plasmid for producing Flp recombinase, which is under the control of <i>P<sub>erg1</sub></i> promoter and the gene expression is induced in the presence of arabinose. Containing the carboxin resistance cassette. Published (Khrunyk, 2010)                                                                                                                                                                                                                                           |
| peGfp_NatR                                    | 3132 | <i>Sfi</i> I-insert of pMF5-1n                          | Plasmid for producing eGfp with the nourseothricin resistance cassette at the <i>upp3</i> locus. The expression of <i>egfp</i> is under the control of <i>P<sub>otef</sub></i> and <i>T<sub>nos</sub></i> terminator.                                                                                                                                                                                                                                                                   |
| pAacrtB <sup>Myc</sup> _NatR <sup>FRTm7</sup> | 3707 | <i>Sfi</i> I-insert of pMF5-1n                          | Plasmid for producing codon-optimized <i>AaCrtB</i> , which is C-terminally fused to 3× Myc tag with the nourseothricin resistance cassette containing FRTm7 (GAAGTTCCTATTCTCTATAAAGTATAGGAAGCTTC), at the <i>car2</i> locus. The expression of <i>AacrtB<sup>Myc</sup></i> is under the control of <i>P<sub>rpl40</sub></i> (1 kb upstream of the ORF) promoter and <i>T<sub>nos</sub></i> terminator.                                                                                 |
| pAat1 <sup>HA</sup> _CbxR                     | 3379 | CbxR for integration at the <i>ip<sup>s</sup></i> locus | Plasmid for producing Aat1 N-terminally fused to 3× HA tag at the <i>ip<sup>s</sup></i> locus. The gene expression is under the control of <i>P<sub>otef</sub></i> promoter and <i>T<sub>nos</sub></i> terminator.                                                                                                                                                                                                                                                                      |
| pHmg1 <sup>NA1-932HA</sup> _CbxR              | 3381 | CbxR for integration at the <i>ip<sup>s</sup></i> locus | Plasmid for producing N-terminally truncated from aa 1 to 932 of Hmg1, which is N-terminally fused to 3× HA tag, at the <i>ip<sup>s</sup></i> locus. The gene expression is under the control of <i>P<sub>otef</sub></i> promoter and <i>T<sub>nos</sub></i> terminator.                                                                                                                                                                                                                |
| pIdi1 <sup>HA</sup> _CbxR                     | 3382 | CbxR for integration at the <i>ip<sup>s</sup></i> locus | Plasmid for producing Idi1 N-terminally fused to 3× HA tag at the <i>ip<sup>s</sup></i> locus. The gene expression is under the control of <i>P<sub>otef</sub></i> promoter and <i>T<sub>nos</sub></i> terminator.                                                                                                                                                                                                                                                                      |
| pAat1G_CbxR                                   | 4230 | CbxR for integration at the <i>ip<sup>s</sup></i> locus | Plasmid for producing Aat1 N-terminally fused to eGfp at the <i>ip<sup>s</sup></i> locus. The gene expression is under the control of <i>P<sub>tef</sub></i> promoter and <i>T<sub>nos</sub></i> terminator.                                                                                                                                                                                                                                                                            |
| pHmg1 <sup>NA1-932G</sup> _CbxR               | 4231 | CbxR for integration at the <i>ip<sup>s</sup></i> locus | Plasmid for producing N-terminally truncated from aa 1 to 932 of Hmg1, which is N-terminally fused to eGfp, at the <i>ip<sup>s</sup></i> locus. The gene expression is under the control of <i>P<sub>tef</sub></i> promoter and <i>T<sub>nos</sub></i> terminator.                                                                                                                                                                                                                      |
| pIdi1G_CbxR                                   | 4232 | CbxR for integration at the <i>ip<sup>s</sup></i> locus | Plasmid for producing Idi1 N-terminally fused to eGfp at the <i>ip<sup>s</sup></i> locus. The gene expression is under the control of <i>P<sub>tef</sub></i> promoter and <i>T<sub>nos</sub></i> terminator.                                                                                                                                                                                                                                                                            |
| pUpa9mC_HygR                                  | 2722 | <i>Sfi</i> I-insert MF1hs                               | Plasmid for producing Upa9 C-terminally fused to mCherry with the hygromycin B resistance cassette at the <i>upa9</i> locus. The insert construct is flanked by the regions, 1.1 kb of <i>upa9</i> (UMAG_06200) ORF and 1.0 kb downstream of <i>upa9</i> . The flanking regions were amplified by PCR using oDD527/oDD605 and oDD634/oDD635 and UM521 wild type DNA as template. The gene expression is under the control of the native promoter and <i>T<sub>nos</sub></i> terminator. |
| peGfp-sk1_CbxR                                | 3141 | CbxR for integration at the <i>ip<sup>s</sup></i> locus | Plasmid for producing eGfp C-terminally fused to SKL at the <i>ip<sup>s</sup></i> locus. The gene expression is under the control of <i>P<sub>otef</sub></i> promoter and <i>T<sub>nos</sub></i> terminator.                                                                                                                                                                                                                                                                            |
| pUpa9G_NatR                                   | 2938 | <i>Sfi</i> I-insert of pMF5-1n                          | Plasmid for producing Upa9 C-terminally fused to eGfp with the nourseothricin resistance cassette at the <i>upa9</i> locus. The insert construct is flanked by the regions, 1.1 kb of <i>upa9</i> ORF and 1.0 kb downstream of <i>upa9</i> . The flanking regions were amplified by PCR using oDD527/oDD605 and oDD634/oDD635 and UM521 wild type DNA as                                                                                                                                |

## Novel production host for sesquiterpenoids

|                                              |      |                                |                                                                                                                                                                                                                                                                                                                                                                     |
|----------------------------------------------|------|--------------------------------|---------------------------------------------------------------------------------------------------------------------------------------------------------------------------------------------------------------------------------------------------------------------------------------------------------------------------------------------------------------------|
|                                              |      |                                | template. The gene expression is under the control the native promoter and $T_{nos}$ terminator.                                                                                                                                                                                                                                                                    |
| pIdi1 <sup>HA</sup> _NatR <sup>FRTm1</sup>   | 4082 | <i>Sfi</i> I-insert of pMF5-1n | Plasmid for producing Idi1 N-terminally fused to 3× HA tag with the nourseothricin resistance cassette containing FRTm1 sites (GAAGTTCC TATTCTCGAGAAAGTATAGGAAGTTC) at both ends for recycling by Flp recombinase at the <i>ccol</i> locus. The gene expression is under the control of $P_{rpl10}$ (1 kb upstream of the ORF) promoter and $T_{hsp70}$ terminator. |
| pCnVS_NatR <sup>FRTm2</sup>                  | 4500 | <i>Sfi</i> I-insert of pMF5-1n | Plasmid for producing dicodon-optimized CnVS with the nourseothricin resistance cassette containing FRTm2 sites (GAAGTTCCTATTCTCAAG AAAGTATAGGAAGTTC) at both ends for recycling by Flp recombinase at the <i>upp3</i> locus. The gene expression is under the control of $P_{otef}$ promoter and $T_{nos}$ terminator.                                             |
| pCnVSG_NatR <sup>FRTm2</sup>                 | 4356 | <i>Sfi</i> I-insert of pMF5-1n | Plasmid for producing expressing dicodon-optimized CnVS, which is N-terminally fused to eGfp with the nourseothricin resistance cassette containing FRTm2 sites at both ends for recycling by Flp recombinase, at the <i>upp3</i> locus. The gene expression is under the control of $P_{otef}$ promoter and $T_{nos}$ terminator.                                  |
| pCnVSG <sup>NES</sup> _NatR <sup>FRTm2</sup> | 4499 | <i>Sfi</i> I-insert of pMF5-1n | Plasmid for producing dicodon-optimized CnVS, which is N-terminally fused to eGfp <sup>NES</sup> with the nourseothricin resistance cassette containing FRTm2 sites at both ends for recycling by Flp recombinase, at the <i>upp3</i> locus. The gene expression is under the control of $P_{otef}$ promoter and $T_{nos}$ terminator.                              |
| pCop6_NatR <sup>FRTm2</sup>                  | 4496 | <i>Sfi</i> I-insert of pMF5-1n | Plasmid for producing dicodon-optimized Cop6 with the nourseothricin resistance cassette containing FRTm2 sites at both ends for recycling by Flp recombinase, at the <i>upp3</i> locus. The gene expression is under the control of $P_{otef}$ promoter and $T_{nos}$ terminator.                                                                                  |
| pCop6G_NatR <sup>FRTm2</sup>                 | 4089 | <i>Sfi</i> I-insert of pMF5-1n | Plasmid for producing dicodon-optimized Cop6, which is N-terminally fused to eGfp with the nourseothricin resistance cassette containing FRTm2 sites at both ends for recycling by Flp recombinase, at the <i>upp3</i> locus. The gene expression is under the control of $P_{otef}$ promoter and $T_{nos}$ terminator.                                             |
| pCop6G <sup>NES</sup> _NatR <sup>FRTm2</sup> | 4316 | <i>Sfi</i> I-insert of pMF5-1n | Plasmid for producing dicodon-optimized Cop6, which is N-terminally fused to eGfp <sup>NES</sup> with the nourseothricin resistance cassette containing FRTm2 sites at both ends for recycling by Flp recombinase, at the <i>upp3</i> locus. The gene expression is under the control of $P_{otef}$ promoter and $T_{nos}$ terminator.                              |

Supplementary Table S4: DNA oligonucleotides used in this study

| Designation | Nucleotide sequence (5'→3')                | Remarks                            |
|-------------|--------------------------------------------|------------------------------------|
| oMB980      | GCAGTCTTGGCGAGCTATTC                       | <i>cco1</i> U1                     |
| oMB981      | GGTCTCGCCTGCAATATTTACCATTTATTCTCTTCATTACTG | <i>cco1</i> U2                     |
| oMB982      | GGTCTCCAGGCCCGGGCAAATGCCTATCGAG            | <i>cco1</i> U3                     |
| oMB983      | GGTCTCCGGCCGCGAGATGGAAGTGCCTCGC            | <i>cco1</i> D1                     |
| oMB984      | GGTCTCGCTGCAATATTTCTTGCTAGGACTGAAAGCG      | <i>cco1</i> D2                     |
| oMB985      | GACAATGGTGCTTTGCAGGG                       | <i>cco1</i> D3                     |
| oMB986      | CTAGGTCTCGTGTCTGAACTCGCACCCAAAGTTG         | <i>cco1</i> UF_fw                  |
| oMB987      | CTAGGTCTCAGACACCCTCCGAATGACTATTTGTAC       | <i>cco1</i> UF_rv                  |
| oUP054      | CCGCGATTCAAGTCAGGTCAG                      | <i>cco1</i> P1                     |
| oUP055      | GAATCTATCAGTGACGGCAC                       | <i>cco1</i> P2                     |
| oMB996      | GCATCTGTGCGAGCAACATC                       | <i>car1</i> U1                     |
| oUP134      | GGTCTCGCCTGCAATATTGATGAATAGCCTCTTTGCCG     | <i>car1</i> U2                     |
| oMB998      | CTAGGTCTCCAGGCCCTTGACCAAGACAAGAACCTCCG     | <i>car1</i> U3                     |
| oMB999      | CTAGGTCTCCGGCCGAGCGTCTACACAACCGGG          | <i>car1</i> D1                     |
| oUP009      | CTAGGTCTCGCTGCAATAATTTGACTTCCATACAATGCTCGC | <i>car1</i> D2                     |
| oUP010      | AAGCTGCTGATGCCGCCCTTG                      | <i>car1</i> D3                     |
| oUP011      | CTAGGTCTCGTGTGCGAGGCGAGGTATAAGCAATG        | <i>car1</i> DF_fw                  |
| oUP012      | CTAGGTCTCAGACACCAAGTTGACGTTCTTGTCTC        | <i>car1</i> DF_rv                  |
| oUP013      | TCTCCCTGCATGGTAGTAGC                       | <i>car2</i> U1                     |
| oUP014      | GGTCTCGCCTGCAATAATACAATAATAAATCGAAGCGGTTAC | <i>car2</i> U2                     |
| oUP015      | GGTCTCCAGGCCGACTGGCACTGATTGGTCAAC          | <i>car2</i> U3                     |
| oUP016      | GGTCTCCGGCCAGCATGCACACATGCATCATC           | <i>car2</i> D1                     |
| oUP017      | GGTCTCGCTGCAATATTTCACTGCGAAGCGGAGGATC      | <i>car2</i> D2                     |
| oUP018      | CGAAACACAGAAGCGATGAG                       | <i>car2</i> D3                     |
| oUP056      | GACAACGCCATGGGACAATC                       | <i>car2</i> P1                     |
| oUP057      | CATAGACGGCGTCGACAATG                       | <i>car2</i> P2                     |
| oUP186      | CTAGGCGCGCCCCAGCTTTCTACCAAACCGCC           | <i>aat1</i> _fw                    |
| oUP187      | CTACCGCGGTTAGTTCTCACGCTTGATAATGATAG        | <i>aat1</i> _rv                    |
| oUP266      | CTAGGCGCGCCTGCAGGATGCTACCTATGTTAC          | <i>hmgI</i> <sup>NA1-932</sup> _fw |
| oUP267      | CTACCGCGGCTATGTGAGAGAAGATGCTCGAC           | <i>hmgI</i> <sup>NA1-932</sup> _rv |
| oUP268      | CTAGGCGCGCCTCGACCGCCACCGTCACCGAG           | <i>idi1</i> _fw                    |
| oUP269      | CTACCGCGGTCAGAGGAGGCGGTGAATGC              | <i>idi1</i> _rv                    |
| oDD527      | GGTCTCGCCTGCAATATTGCCAATGGCACTAC           | <i>Upa9</i> U2                     |
| oDD605      | GGTCTCGTGGCCAAAGAAGACCAGGCAGCATAG          | <i>Upa9</i> U3                     |
| oDD634      | GGTCTCCGGCCTAGTAGGGTCCAACGTCTAC            | <i>Upa9</i> D1                     |
| oDD635      | GGTCTCCCTGCCAATATTCGACCTCGAGGCCGAG         | <i>Upa9</i> D2                     |
| oMB935      | GATCCCATGGTGAGCAAGGGCGAGGAG                | SKL_fw                             |
| oMB936      | GCGGCCGCTTTAGAGCTTGACTTGTACAGCTCGTCCAT     | SKL_rv                             |
| oUM121      | CTACCTGCAGGGGTACTGATGACGATGACGAAGAAG       | <i>Prps1</i> _fw                   |
| oUM122      | CTACCATGGGATGAATCGATATGTCTTGAGGAAG         | <i>Prps1</i> _rv                   |
| oUM123      | CTACCTGCAGGGTATGTGTAGAGGTGGCCTTG           | <i>Prpl10</i> _fw                  |
| oUM124      | CTACCATGGCTTGAATACTGTTGGATGGGAGG           | <i>Prpl10</i> _rv                  |
| oAB049      | CATGACCAAGAAGTTTGGCACGCTCACCATCT           | NES_fw                             |
| oAB050      | CCGGAGATGGTGAGCGTGCCAAACTTCTTGGT           | NES_rv                             |

Supplementary Table S5: Codon optimized DNA sequences for expression in *U. maydis*

| Phytoene synthase <i>AaCrtB</i> from <i>Agrobacterium aurantiacum</i>                                                                                                                                                                                                                                                                                                                                                                                                                                                                                                                                                                                                                                                                                                                                                                                                                                                                                                                                                                                                                                                                                                                                                                                                                                                                                                                                                                                                                                                                                                                                                                                                                                                                                                                                                                                                                                    |
|----------------------------------------------------------------------------------------------------------------------------------------------------------------------------------------------------------------------------------------------------------------------------------------------------------------------------------------------------------------------------------------------------------------------------------------------------------------------------------------------------------------------------------------------------------------------------------------------------------------------------------------------------------------------------------------------------------------------------------------------------------------------------------------------------------------------------------------------------------------------------------------------------------------------------------------------------------------------------------------------------------------------------------------------------------------------------------------------------------------------------------------------------------------------------------------------------------------------------------------------------------------------------------------------------------------------------------------------------------------------------------------------------------------------------------------------------------------------------------------------------------------------------------------------------------------------------------------------------------------------------------------------------------------------------------------------------------------------------------------------------------------------------------------------------------------------------------------------------------------------------------------------------------|
| ATGTCGGACCTGGTTCTTACGTCTACCGAAGCTATTACACAAGGCTCGCAGTCGTTTCGCTACAGCGGCGAAGCTTATGCCT<br>CCTGGCATCCGCGACGATACAGTCATGCTCTATGCGTGGTGCCGTCATGCTGATGACGTGATTGATGGTCAGGCGCTCGGA<br>AGCCGTCCCGAGGCGGTGAACGACCCACAAGCTCGCCTTGATGGACTCCGCGCAGACACCCTGGCCGCCCTTCAGGGTGA<br>TGGTCCGGTGACCCCTCCATTTGCTGCATTGCGAGCCGTGGCAGCAGACGACGATTTTCCTCAAGCGTGGCCCTATGGATCT<br>CATTGAGGGTTTCGCAATGGATGTTGAGGCTCGTGATTACCGTACACTCGACGACGTGCTGGAGTACAGCTATCATGTTGC<br>CGGAATTGTGCGGCGTCATGATGGCCCGAGTCATGGGTGTCCGCGATGATCCTGTGTTGGACCGAGCCTGTGACCTGGGTCT<br>GGCATTCCAGCTGACAAATATCGCACGCGACGTATCGACGACGCTCGAATTGGACGATGCTACCTTCCAGGAGACTGGC<br>TGGACCAAGCGGGCGCACGAGTGGACGGACAGTTCCAAGCCAGAGCTTTACACCGTCATTTTGGCTCTGTTGGACGCA<br>GCCGAATTGTATTACGCTCTGACGAGTGGCTTGGCAGATTGCTCCGCGATGCGCGTGGAGCATCGCCGCTGCACTC<br>CGCATCTATCGTGCCATTGGACTGCGTATCCGCAAAGGAGGACCAGAGGCATACCGTCAACGTATTTCCACTTCCAAAGCT<br>GCTAAAATTGGACTCTGGGCATTGGCGGCTGGGACGTTGCACGACGCCGCTCCCCGGCGCGGGTGTGACCCGCCAAGG<br>CCTGTGGACTCGACCGCACCATGCATAG                                                                                                                                                                                                                                                                                                                                                                                                                                                                                                                                                                                                                                                                                                                                                                                                                                                                                                                 |
| (+)-valencene synthase <i>CnVS</i> from <i>Callitropsis nootkatensis</i>                                                                                                                                                                                                                                                                                                                                                                                                                                                                                                                                                                                                                                                                                                                                                                                                                                                                                                                                                                                                                                                                                                                                                                                                                                                                                                                                                                                                                                                                                                                                                                                                                                                                                                                                                                                                                                 |
| ATGGCCGAGATGTTCAACGGCAACTCGAGCAACGACGGCTCGTCGTGTATGCCCGTCAAGGACGCGCTGCGCCGACCCGG<br>CAACCACCACCCCAACCTCTGGACCGACGACTTTATCCAGTCGCTCAACTCGCCCTACTCGGACTCGTCGTACCACAAGCA<br>CCGCGAGATCCTCATCGACGAGATCCGCGACATGTTCTCAACGGCGAGGGCGACGAGTTCGGTGTGCTCGAGAACATCT<br>GGTTCGTGACGTCGTCCAGCGTCTCGGCATCGACCGCCACTTCCAGGAGGAGATCAAGACGGCGCTCGACTACATCTACA<br>AGTTCTGGAACCAACGATTCGATCTTTGGCGACCTCAACATGGTTCGCTCTCGGTTTCCGCATCCTGCGTCTCAACCGTACGT<br>CGCTTCGAGCGACGTCTTCAAGAAGTTCAAGGGCGAGGAGGGTCAGTTCTCGGGCTTCGAGTCGTCGACCGAGGACGCCA<br>AGCTCGAAATGATGCTCAACCTGTACAAGGCTTCCGAGCTCGACTTCCCGACGAGGACATTCTCAAGGAGGCGCGTGCTT<br>TTGCTTCGATGTACCTCAAGCAGTCAATCAAGGAGTACGGTGACATCCAGGAGAGCAAGAACCCTGCTCATGGAGATC<br>GAGTACACCTTCAAGTACCCTTGGCGTTGCCGTCTGCCCGTCTCGAGGCGTGGAACCTTATCCACATCATGCGTCAAGCAG<br>GACTGCAACATCTCGCTCGCCAACAACCTCTACAAGATCCCCAAGATCTACATGAAAAAGATCCTCGAGCTCGCCATCCTC<br>GACTTCAACATCCTCCAGTCGCGACGACGAGATGAAGCTCATCTCGACCTGGTGGAAGAACTCGTCGGCCATCCA<br>GCTCGACTTTTCCGTACCCGCCACATCGAGTCGTACTTCTGGTGGGCTCGCCCTCTTCGAGCCCGAGTTCTCGACGTGC<br>CGCATCAACTGCACCAAGTCTCGACCAAGATGTTCTGCTCGACGACATCTACGACACCTACGGCACCCTCGAAGAGCTC<br>AAGCCCTTCAACCACGCTCACCCTGTTGGGACGTCTCGACCGTCGACAACCACCCGACTACATGAAGATCGCTTCAAC<br>TTAGCTACGAGATCTACAAGGAGATCGCCTCGGAAGCTGAGCGCAAGCACGGTCTCTTTGTCTACAAGTACCTCCAGTCTG<br>TGCTGGAAGTCGTACATCGAGGCGTACATGCAAGGAGGCGAGTGGATCGCCAGCAACCACATCCCTGGTTTCGACGAGTA<br>CCTCATGAACGGTGTCAAGTCGTGGGTATGCGCATCCTCATGATTCACGCGCTCATCCTCATGGACACGCCGCTCTCCGA<br>CGAGATTCTCGAACAGCTCGACATCCCTTCGTGCAAGTCGCGAGGCTCTGCTCTCGCTCATCACGCGTCTCGTCGACGACGT<br>CAAGGACTTTGAAGACGAGCAGGCGCATGGCGAGATGGCTTCGTGATCGAGTGCTACATGAAGGACAACCACGGTTTCGA<br>CGCGCGAGGATGCGCTCAACTACCTCAAGATCCGCATCGAGTCGTGCGTCCAGGAGCTCAACAAGGAGTTGCTCGAGCCC<br>TCGAACATGCACGGCTCGTTCCGCAACCTCTACCTCAACGTGCGCATGCGTGTCTCTTTCATGCTCAACGACGGTGAC<br>CTCTTACCCACTCGAACCGCAAGGAGATCCAGGACGCCATCACCAGTTCTTTGTGCGAGCCCATCATCCCTGA |
| The fungal sesquiterpenoid synthase <i>Cop6</i> from <i>Coprinopsis cinerea</i>                                                                                                                                                                                                                                                                                                                                                                                                                                                                                                                                                                                                                                                                                                                                                                                                                                                                                                                                                                                                                                                                                                                                                                                                                                                                                                                                                                                                                                                                                                                                                                                                                                                                                                                                                                                                                          |
| ATGCCTGCTGCTCTGCCCTACAACGTCTCGCGCGACAACAAGTGGGATATCAAGAAGATCATCCAGGACTTTTCAAGCGC<br>TGCGATGTGCCCTACCAAGGTATCCCTACGACACCGAGCTCTGGAACGCCTGCCTCAAGCGTGCCAAGGAGAAGGGCTA<br>CCCCGTGAGCCCCGACTCGCCATGTGCTCTACCGCAGCTTCAAGGTGCGTGTGTCATCACGCGCACCTCGTACGGTCA<br>CATCCAGGACTACGAGATCCTCATCTGGGTGCGCCACCTTACCGCCTTTGTACCTACGCCGACGACGCTTCCAGGAGGA<br>CATCCAGCACCTCCACAGCTTCGCTCGCACCTTCTCCAGAACGAAAAGCACGAGCATCCCGTCTCGAGGCCCTTGCCCA<br>GTTCTCTGCGCGAGTCGTGATCCGATTCTCGCACTTTGTGCGCAACACCGTCTGCTCGTGGCGCTGCGCTTCATGATGTCG<br>ATCGCGTCTGAGTTGAGGGTCAAGAGTCTCGGTCTCGACCGAGGCGCGTGAGTACCCTGGCTACATCCGCATCCTCTCG<br>GGTCTCTCGGACATCTACGCGCTCTTCGCTTCCCCATGGACCTGCCGCGTTCACCTACATCCAGGCCCTCCCCGAGCAGA<br>TCGACTACATCAACGGCACCAACGACCTGCTCTGTTCTACAAGGAGGAGCTCGACTGCGAGACCGTCAACTTTATCTCGG<br>CCGCTGCCACCTCGCAGCAGGTGAGCAAGCTCGAGGTGCTGCGCAACGCCGCGAGAAGGCCGCCCTACTCGTACGACGTC<br>GTCGTCAACGTGCTCAAGCCCTACCCGAGGCGCTTGGCGCTGAAGTCTGTTGCTCGCGGCTTCTGCTACTTCCACACCT<br>CGTCGCCACGCTACCGTCTCGGCGAGATGTTCCACGACTTTGAGCACGACCTCGTCTGCAAGTGCGCCTCGTGACCCGAGA<br>TCTGA                                                                                                                                                                                                                                                                                                                                                                                                                                                                                                                                                                                                                                                                                                                                                                                                                                                         |
